# Supplementary material for: Computer modeling of the complexes of Chlorin e6 with amphiphilic polymers
Source: Royal Society of Chemistry journal article supplement (doi:10.1039/c3cp55510k), 2014-01-01
Supplement: c3cp55510k1.pdf [file c3cp55510k1.pdf]

Table 1S.  
Partial atomic charges in Ce6 molecule calculated by different approaches.

|                                     | Basis set for ab initio DFT-B3LYP calculations |          |         |               |          |         |               |          |         | Semi-empirical quantum mechanics |          |            | Topological approach |
|-------------------------------------|------------------------------------------------|----------|---------|---------------|----------|---------|---------------|----------|---------|----------------------------------|----------|------------|----------------------|
|                                     | 6-311G(2d,2p)                                  |          |         | 6-311G(2d,2p) |          |         | 6-31G(d)      |          |         | PM3                              | PM6      | PM6        | Gastaiger-Hückel     |
|                                     | without water                                  |          |         | with water    |          |         | without water |          |         | without water                    |          | with water | without water        |
| Atom number corresponding to Fig. 1 | CHELPG                                         | MPA      | NPA     | CHELPG        | MPA      | NPA     | CHELPG        | MPA      | NPA     |                                  |          |            |                      |
| 1                                   | 0.113644                                       | 0.189662 | 0.18117 | 0.185344      | 0.196495 | 0.20154 | 0.128738      | 0.415238 | 0.18036 | -0.15804                         | 0.070363 | 0.176872   | 0.0778               |
| 2                                   | -0.03467                                       | -0.06125 | 0.01304 | -0.0596       | -0.0613  | 0.02654 | -0.04558      | 0.039039 | -0.0085 | -0.05193                         | 0.091302 | 0.044146   | -0.0034              |
| 2 <sup>1</sup>                      | 0.060872                                       | -0.17276 | -0.6129 | 0.029086      | -0.16698 | -0.6254 | 0.045637      | -0.56079 | -0.7149 | -0.04936                         | -0.47997 | -0.48068   | -0.0302              |
| 3 <sup>1</sup>                      | -0.05726                                       | -0.08433 | -0.1895 | -0.11281      | -0.11124 | -0.2179 | -0.06025      | -0.08952 | -0.2226 | -0.03671                         | -0.02578 | -0.10086   | -0.0662              |
| 3 <sup>2</sup>                      | -0.32461                                       | -0.13179 | -0.3836 | -0.27939      | -0.12493 | -0.3369 | -0.33101      | -0.36909 | -0.4399 | -0.21386                         | -0.39532 | -0.31512   | -0.1032              |
| 4                                   | 0.066066                                       | 0.163647 | 0.19634 | 0.090512      | 0.162584 | 0.20474 | 0.080169      | 0.410867 | 0.19253 | -0.04654                         | 0.238544 | 0.220315   | 0.0775               |
| 5m                                  | -0.27614                                       | -0.16865 | -0.2854 | -0.27462      | -0.15862 | -0.2719 | -0.29249      | -0.3385  | -0.3113 | -0.27236                         | -0.44969 | -0.41764   | -0.0284              |

|                 |          |          |         |          |          |         |          |          |         |          |          |          |         |
|-----------------|----------|----------|---------|----------|----------|---------|----------|----------|---------|----------|----------|----------|---------|
| 6               | 0.252178 | 0.21754  | 0.20293 | 0.301098 | 0.200388 | 0.22026 | 0.238944 | 0.341288 | 0.19961 | 0.045912 | 0.253646 | 0.276575 | -0.0374 |
| 7               | -0.00491 | -0.04239 | -0.0720 | -0.01018 | -0.0469  | -0.0591 | 0.011015 | 0.028237 | -0.0777 | -0.15843 | -0.11341 | -0.10507 | -0.0709 |
| 7 <sup>1</sup>  | -0.01008 | -0.17605 | -0.5907 | -0.04989 | -0.16547 | -0.6005 | -0.06656 | -0.52956 | -0.6887 | -0.0337  | -0.43405 | -0.44419 | -0.049  |
| 8               | -0.27379 | -0.03688 | -0.0496 | -0.27149 | -0.04733 | -0.0360 | -0.26439 | 0.044438 | -0.0636 | -0.10162 | -0.04994 | -0.05125 | -0.0687 |
| 8 <sup>1</sup>  | 0.321662 | -0.15683 | -0.3921 | 0.284873 | -0.15387 | -0.3993 | 0.277782 | -0.33652 | -0.4671 | -0.02871 | -0.21891 | -0.22565 | -0.0383 |
| 8 <sup>2</sup>  | -0.00159 | -0.13895 | -0.5503 | 0.013741 | -0.14996 | -0.5521 | -0.07606 | -0.43055 | -0.6633 | -0.11142 | -0.45026 | -0.45157 | -0.0595 |
| 9               | 0.253594 | 0.22498  | 0.12324 | 0.278416 | 0.203044 | 0.12923 | 0.246664 | 0.289458 | 0.11625 | -0.14789 | -0.00687 | 0.045876 | -0.0325 |
| 10m             | -0.29031 | -0.10187 | -0.1805 | -0.3113  | -0.09332 | -0.1729 | -0.28064 | -0.27384 | -0.2148 | 0.114524 | 0.006126 | -0.05838 | -0.021  |
| 11              | 0.135086 | 0.116741 | 0.10007 | 0.158291 | 0.095767 | 0.08854 | 0.120573 | 0.360986 | 0.11582 | -0.32262 | -0.16604 | -0.13904 | 0.0895  |
| 12              | -0.04082 | -0.06506 | 0.00191 | -0.06943 | -0.07468 | 0.0063  | -0.0252  | 0.000711 | -0.0286 | -0.1665  | 0.044344 | 0.063776 | 0.0065  |
| 12 <sup>1</sup> | 0.006507 | -0.17285 | -0.5931 | -0.0301  | -0.16883 | -0.6008 | -0.05647 | -0.52852 | -0.6918 | -0.02325 | -0.45826 | -0.47431 | -0.0255 |
| 13              | -0.20812 | 0.086402 | -0.1581 | -0.27475 | 0.005834 | -0.2096 | -0.22545 | 0.045226 | -0.1612 | -0.13114 | -0.26709 | -0.38224 | 0.0886  |
| 13 <sup>1</sup> | 0.822944 | 0.523005 | 0.83028 | 0.898141 | 0.553684 | 0.84241 | 0.815831 | 0.444877 | 0.81723 | 0.503644 | 0.722745 | 0.75468  | 0.2448  |
| 14              | 0.159016 | 0.144088 | 0.21838 | 0.147826 | 0.107287 | 0.19293 | 0.17517  | 0.339848 | 0.22229 | -0.16852 | 0.082091 | 0.084396 | 0.0946  |
| 15              | -0.00379 | 0.052776 | 0.02746 | -0.05126 | 0.011245 | -0.0271 | -0.01154 | 0.172592 | 0.00824 | 0.135854 | 0.158265 | 0.021395 | 0.0265  |
| 15 <sup>1</sup> | -0.36139 | -0.29034 | -0.5362 | -0.31872 | -0.29958 | -0.5331 | -0.35255 | -0.48872 | -0.5974 | -0.20016 | -0.51828 | -0.47439 | 0.0337  |
| 15 <sup>2</sup> | 0.772201 | 0.524526 | 0.78924 | 0.768546 | 0.514206 | 0.8033  | 0.782006 | 0.548176 | 0.76088 | 0.416446 | 0.747987 | 0.771414 | 0.044   |
| 16              | 0.138095 | 0.309756 | 0.20147 | 0.103975 | 0.270983 | 0.18359 | 0.129768 | 0.218047 | 0.18929 | -0.17579 | -0.01669 | 0.074455 | 0.0285  |

|                     |          |          |         |          |          |         |          |          |         |          |          |          |         |
|---------------------|----------|----------|---------|----------|----------|---------|----------|----------|---------|----------|----------|----------|---------|
| 17                  | 0.076783 | -0.13002 | -0.2540 | 0.076559 | -0.12906 | -0.2553 | 0.110537 | -0.18017 | -0.288  | -0.0473  | -0.11644 | -0.14295 | 0.0248  |
| 17 <sup>1</sup>     | -0.02655 | -0.02212 | -0.3672 | -0.0034  | -0.03396 | -0.3630 | -0.10003 | -0.24614 | -0.4467 | -0.09254 | -0.22047 | -0.20869 | -0.0232 |
| 17 <sup>2</sup>     | -0.03103 | -0.17469 | -0.4803 | -0.02185 | -0.19545 | -0.4891 | -0.05097 | -0.3462  | -0.5514 | -0.17447 | -0.46529 | -0.46612 | 0.0029  |
| 17 <sup>3</sup>     | 0.757164 | 0.435762 | 0.78726 | 0.763304 | 0.413944 | 0.79781 | 0.743257 | 0.525399 | 0.76456 | 0.420215 | 0.74679  | 0.762301 | 0.035   |
| 18                  | 0.251434 | -0.1199  | -0.2386 | 0.220146 | -0.12235 | -0.2432 | 0.174137 | -0.1793  | -0.2803 | -0.09223 | -0.14168 | -0.17904 | 0.0206  |
| 18 <sup>1</sup>     | -0.16677 | -0.1378  | -0.5567 | -0.17032 | -0.14214 | -0.5594 | -0.18729 | -0.45507 | -0.6637 | -0.10816 | -0.47104 | -0.46475 | -0.0467 |
| 19                  | 0.313097 | 0.256359 | 0.26828 | 0.340808 | 0.247191 | 0.28697 | 0.334643 | 0.369558 | 0.2516  | -0.0775  | 0.165464 | 0.297392 | 0.0181  |
| 20m                 | -0.39072 | -0.13163 | -0.2914 | -0.43266 | -0.14697 | -0.3083 | -0.40525 | -0.31386 | -0.3142 | -0.11617 | -0.26634 | -0.40719 | -0.0136 |
| N(I)                | -0.03686 | -0.21965 | -0.5207 | -0.09111 | -0.22373 | -0.5243 | -0.06536 | -0.77889 | -0.5271 | 0.320513 | -0.21925 | -0.24052 | -0.2671 |
| N(II)               | -0.45146 | -0.52089 | -0.5704 | -0.50741 | -0.52366 | -0.5898 | -0.43379 | -0.66635 | -0.5485 | -0.11419 | -0.39538 | -0.46032 | -0.4013 |
| N(III)              | -0.17538 | -0.19813 | -0.4859 | -0.19562 | -0.18358 | -0.4881 | -0.17537 | -0.76141 | -0.4964 | 0.565765 | -0.0107  | -0.01821 | -0.2652 |
| N(IV)               | -0.456   | -0.50965 | -0.5406 | -0.47948 | -0.50862 | -0.5677 | -0.44403 | -0.61799 | -0.5145 | -0.04107 | -0.35564 | -0.46577 | -0.3085 |
| H(N(1))             | 0.147893 | 0.150948 | 0.45583 | 0.148282 | 0.142221 | 0.44817 | 0.150107 | 0.395506 | 0.46821 | 0.13574  | 0.331838 | 0.319068 | 0.222   |
| H(NIII)             | 0.206881 | 0.144547 | 0.4386  | 0.212809 | 0.140878 | 0.43879 | 0.200658 | 0.381408 | 0.45399 | 0.077884 | 0.282348 | 0.289464 | 0.2248  |
| O(17 <sup>2</sup> ) | -0.731   | -0.57341 | -0.7875 | -0.7992  | -0.61768 | -0.8326 | -0.72094 | -0.62072 | -0.7683 | -0.63812 | -0.77799 | -0.83074 | -0.569  |
| O(17 <sup>2</sup> ) | -0.785   | -0.61009 | -0.7912 | -0.84352 | -0.65067 | -0.8385 | -0.76824 | -0.64372 | -0.7688 | -0.66226 | -0.8065  | -0.84453 | -0.569  |
| O(15 <sup>2</sup> ) | -0.705   | -0.58993 | -0.7638 | -0.77738 | -0.63805 | -0.8124 | -0.70844 | -0.60865 | -0.7464 | -0.62635 | -0.75616 | -0.81307 | -0.5667 |
| O(15 <sup>2</sup> ) | -0.75004 | -0.62691 | -0.8007 | -0.81506 | -0.66602 | -0.8439 | -0.75118 | -0.65467 | -0.7776 | -0.65154 | -0.7962  | -0.84332 | -0.5667 |

|                         |          |          |         |          |          |         |          |          |         |          |          |          |         |
|-------------------------|----------|----------|---------|----------|----------|---------|----------|----------|---------|----------|----------|----------|---------|
| O(13 <sup>1</sup> )     | -0.61592 | -0.45921 | -0.6175 | -0.66223 | -0.49201 | -0.6484 | -0.60524 | -0.47699 | -0.6071 | -0.43799 | -0.58196 | -0.63121 | -0.371  |
| OH(13 <sup>1</sup> )    | -0.55563 | -0.41621 | -0.6765 | -0.59583 | -0.43359 | -0.6845 | -0.5812  | -0.53949 | -0.6822 | -0.26849 | -0.47955 | -0.49918 | -0.2974 |
| H(13 <sup>1</sup> )     | 0.404817 | 0.237765 | 0.49928 | 0.436449 | 0.256478 | 0.50631 | 0.428116 | 0.411017 | 0.50936 | 0.242569 | 0.354589 | 0.360121 | 0.2515  |
| H(10m)                  | 0.176551 | 0.041629 | 0.19752 | 0.21426  | 0.082509 | 0.21975 | 0.16326  | 0.118905 | 0.22966 | 0.094262 | 0.145319 | 0.178037 | 0.0756  |
| H(CH3-7 <sup>1</sup> )  | 0.024165 | 0.035416 | 0.19112 | 0.062144 | 0.065364 | 0.20928 | 0.031859 | 0.132148 | 0.22406 | 0.032821 | 0.144557 | 0.16664  | 0.0327  |
| H(CH3-7 <sup>1</sup> )  | -0.01122 | 0.059603 | 0.19725 | 0.019368 | 0.075463 | 0.2093  | 0.005645 | 0.143238 | 0.23145 | 0.039422 | 0.151021 | 0.165853 | 0.0327  |
| H(CH3-7 <sup>1</sup> )  | -0.01539 | 0.061145 | 0.19665 | 0.009351 | 0.075629 | 0.20893 | 0.003628 | 0.143558 | 0.23195 | 0.040425 | 0.153004 | 0.167961 | 0.0327  |
| H(5m)                   | 0.083181 | 0.028938 | 0.18157 | 0.106301 | 0.071497 | 0.20559 | 0.09133  | 0.087604 | 0.21111 | 0.102006 | 0.171958 | 0.200104 | 0.062   |
| H(CH3-2 <sup>1</sup> )  | -0.01185 | 0.063958 | 0.20772 | 0.013443 | 0.081826 | 0.22283 | -0.00418 | 0.159056 | 0.24213 | 0.04513  | 0.170154 | 0.183941 | 0.0386  |
| H(CH3-2 <sup>1</sup> )  | -0.01757 | 0.059391 | 0.20501 | 0.016831 | 0.082098 | 0.22296 | -0.00813 | 0.154216 | 0.23879 | 0.044231 | 0.167658 | 0.185156 | 0.0386  |
| H(CH3-2 <sup>1</sup> )  | 0.037133 | 0.068824 | 0.21581 | 0.059162 | 0.084378 | 0.22474 | 0.037093 | 0.172616 | 0.24959 | 0.052627 | 0.168878 | 0.179483 | 0.0386  |
| H(20m)                  | 0.108012 | 0.046393 | 0.19931 | 0.131165 | 0.077023 | 0.21891 | 0.11422  | 0.110459 | 0.22755 | 0.114028 | 0.170196 | 0.204017 | 0.0503  |
| H(C18)                  | -0.03867 | 0.040834 | 0.20918 | -0.02684 | 0.048495 | 0.2122  | -0.02091 | 0.137305 | 0.24938 | 0.090485 | 0.147829 | 0.160393 | 0.0535  |
| H(C17)                  | 0.003238 | 0.032804 | 0.21427 | 0.006071 | 0.03485  | 0.21326 | -0.00162 | 0.142454 | 0.25295 | 0.097395 | 0.154198 | 0.158486 | 0.054   |
| H(CH3-18 <sup>1</sup> ) | -0.00212 | 0.01674  | 0.17492 | 0.036232 | 0.058153 | 0.19703 | 0.010343 | 0.107951 | 0.20897 | 0.016572 | 0.1266   | 0.159274 | 0.0261  |
| H(CH3-18 <sup>1</sup> ) | 0.011724 | 0.061641 | 0.19208 | 0.01507  | 0.059407 | 0.19175 | 0.026205 | 0.149239 | 0.22925 | 0.04637  | 0.159456 | 0.158012 | 0.0261  |
| H(CH3-18 <sup>1</sup> ) | 0.018527 | 0.057613 | 0.19857 | 0.023834 | 0.062828 | 0.19919 | 0.031477 | 0.147549 | 0.23294 | 0.048055 | 0.154958 | 0.160955 | 0.0261  |
| H(CH3-12 <sup>1</sup> ) | -0.00176 | 0.052202 | 0.21237 | 0.015567 | 0.054271 | 0.20848 | 0.026524 | 0.160987 | 0.24611 | 0.049319 | 0.166845 | 0.166567 | 0.0415  |

|                           |          |          |         |          |          |         |          |          |         |          |          |          |        |
|---------------------------|----------|----------|---------|----------|----------|---------|----------|----------|---------|----------|----------|----------|--------|
| H(CH3-12 <sup>1</sup> )   | -0.00299 | 0.055019 | 0.19383 | 0.025741 | 0.079043 | 0.21038 | 0.013473 | 0.13888  | 0.22869 | 0.028036 | 0.15087  | 0.174953 | 0.0415 |
| H(CH3-12 <sup>1</sup> )   | -0.02459 | 0.051737 | 0.19086 | 0.013875 | 0.078482 | 0.20932 | -0.00489 | 0.133714 | 0.2251  | 0.022125 | 0.14557  | 0.176389 | 0.0415 |
| H(vinyl-C3 <sup>1</sup> ) | 0.094692 | 0.04307  | 0.19166 | 0.12493  | 0.075925 | 0.20708 | 0.093838 | 0.120768 | 0.22462 | 0.09371  | 0.133677 | 0.15385  | 0.0609 |
| H(vinyl-C3 <sup>2</sup> ) | 0.093255 | 0.03736  | 0.1756  | 0.125029 | 0.080235 | 0.19673 | 0.101841 | 0.111214 | 0.20594 | 0.077332 | 0.147296 | 0.164544 | 0.0485 |
| H(vinyl-C3 <sup>2</sup> ) | 0.12211  | 0.052679 | 0.18871 | 0.13399  | 0.079659 | 0.19431 | 0.118571 | 0.140843 | 0.2131  | 0.101522 | 0.164772 | 0.168085 | 0.0485 |
| H(CH2-17 <sup>1</sup> )   | -0.00722 | 0.049134 | 0.21369 | -0.03322 | 0.025815 | 0.19766 | 0.022593 | 0.160234 | 0.2523  | 0.083324 | 0.158426 | 0.140978 | 0.0315 |
| H(CH2-17 <sup>1</sup> )   | -0.04403 | 0.023065 | 0.189   | -0.0442  | 0.031222 | 0.1877  | -0.0128  | 0.123397 | 0.23178 | 0.055479 | 0.138854 | 0.137283 | 0.0315 |
| H(CH2-17 <sup>2</sup> )   | -0.05335 | 0.013414 | 0.17327 | -0.03175 | 0.04174  | 0.19067 | -0.03646 | 0.102021 | 0.21004 | 0.035389 | 0.143541 | 0.171394 | 0.0432 |
| H(CH2-17 <sup>2</sup> )   | -0.03164 | 0.02836  | 0.18605 | -0.02709 | 0.051552 | 0.19641 | -0.01609 | 0.114956 | 0.22317 | 0.046321 | 0.152913 | 0.170519 | 0.0432 |
| H(CH2-15 <sup>1</sup> )   | 0.129748 | 0.06878  | 0.23332 | 0.097181 | 0.055111 | 0.22442 | 0.115807 | 0.178563 | 0.26635 | 0.097767 | 0.203265 | 0.192707 | 0.056  |
| H(CH2-15 <sup>1</sup> )   | 0.131183 | 0.081297 | 0.23465 | 0.123288 | 0.086065 | 0.23233 | 0.129187 | 0.171429 | 0.26763 | 0.091875 | 0.193715 | 0.188327 | 0.056  |
| H(CH2-8 <sup>1</sup> )    | -0.07767 | 0.036937 | 0.18595 | -0.04887 | 0.061873 | 0.20217 | -0.05693 | 0.122001 | 0.22715 | 0.044727 | 0.129691 | 0.149466 | 0.0369 |
| H(CH2-8 <sup>1</sup> )    | -0.09263 | 0.049757 | 0.19417 | -0.07591 | 0.061036 | 0.20022 | -0.06902 | 0.135106 | 0.23472 | 0.051554 | 0.133739 | 0.143932 | 0.0369 |
| H(CH2-8 <sup>2</sup> )    | -0.04275 | 0.026066 | 0.17502 | -0.01381 | 0.056579 | 0.19325 | -0.02058 | 0.11121  | 0.21113 | 0.025351 | 0.132376 | 0.154051 | 0.0247 |
| H(CH2-8 <sup>2</sup> )    | -0.01911 | 0.066772 | 0.19645 | -0.02942 | 0.060692 | 0.19137 | 0.010132 | 0.155979 | 0.23398 | 0.050625 | 0.15809  | 0.153311 | 0.0247 |
| H(CH2-8 <sup>2</sup> )    | -0.0211  | 0.051098 | 0.18625 | -0.01906 | 0.064403 | 0.19144 | 0.006076 | 0.139079 | 0.22316 | 0.039386 | 0.148878 | 0.154596 | 0.0247 |

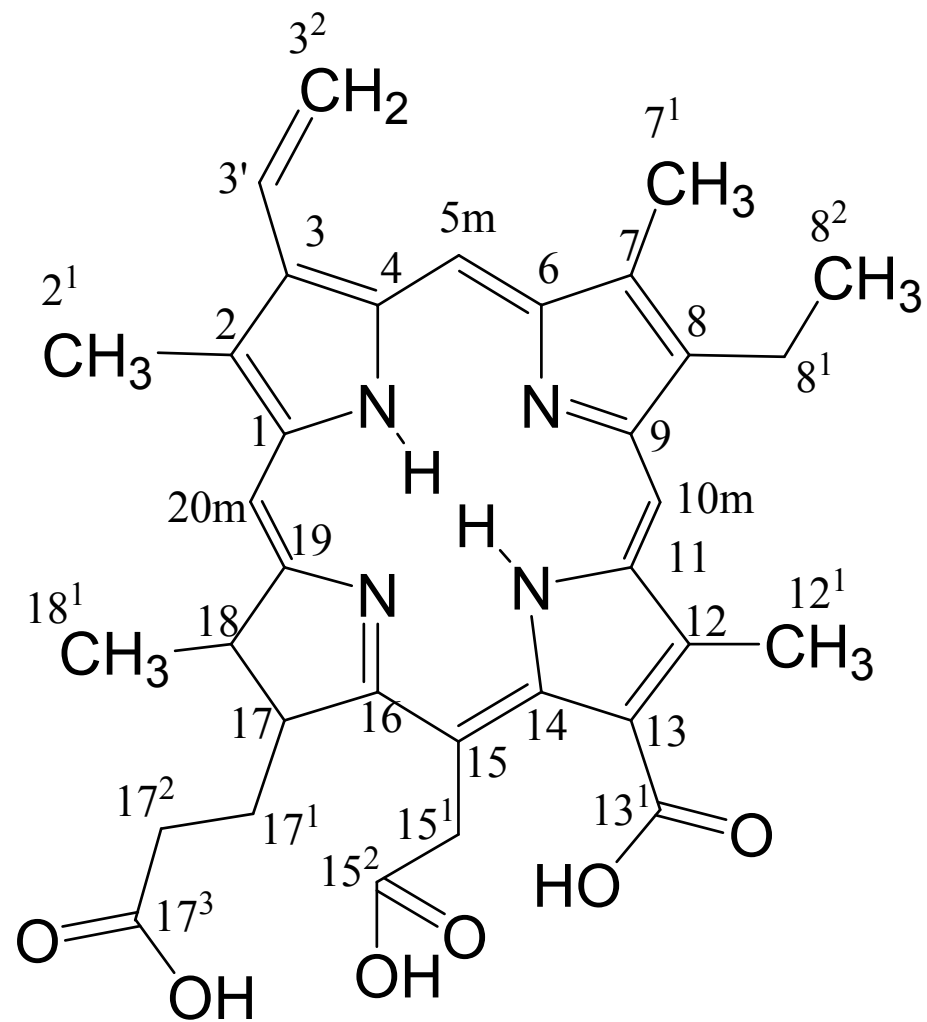

*Chlorin e6*
